# Supplementary material
Source: HighWire-hosted journal article supplement (https://www.cmajopen.ca/highwire/filestream/80999/field_highwire_adjunct_files/1/open-2016-0161-2-at.pdf)
Supplement: open-2016-0161-2-at.pdf [file open-2016-0161-2-at.pdf]

**Appendix 2 (as supplied by the authors): All parameters used in used in the model**

| <b>Adverse Events</b>             |                                     |                                  |                                  |                                                  |
|-----------------------------------|-------------------------------------|----------------------------------|----------------------------------|--------------------------------------------------|
| <b>Description</b>                | <b>Baseline<sup>a</sup>/<br/>RR</b> | <b>Lower Limit<br/>(95% CrI)</b> | <b>Upper Limit<br/>(95% CrI)</b> | <b>Probability Distribution</b>                  |
| <b>Treatment-Naive</b>            |                                     |                                  |                                  |                                                  |
| <b>Depression</b>                 |                                     |                                  |                                  |                                                  |
| Reference baseline PR48           | 0.1381 <sup>a</sup>                 | 0.11                             | 0.1683                           | Based on NMA (1)                                 |
| SOF12 + RBV12                     | 0.2861                              | 0.07992                          | 0.958                            | Based on NMA (1)                                 |
| SOF24 + RBV24                     | 0.7751                              | 0.165                            | 3.181                            | Based on NMA (1)                                 |
| SIM12 + SOF12                     | 0.4174                              | 0.08099                          | 1.534                            | Assume same as PAR/RIT12 + OMB12 + DAS12         |
| SOF12 + LDV12                     | 0.01888                             | 0.002205                         | 0.09946                          | Based on NMA (1)                                 |
| PAR/RIT12 + OMB12 + DAS12         | 0.4174                              | 0.08099                          | 1.534                            | Assume same as PAR/RIT12 + OMB12 + DAS12 + RBV12 |
| PAR/RIT12 + OMB12 + DAS12 + RBV12 | 0.4174                              | 0.08099                          | 1.534                            | Based on NMA (1)                                 |
| T12 PR24-48 RGT q8                | 0.8187                              | 0.35                             | 1.872                            | Based on NMA (1)                                 |
| SOF12 + PR12                      | 0.5715                              | 0.2133                           | 1.531                            | Based on NMA (1)                                 |
| SOF12 + PR24-48 RGT               | 0.9319                              | 0.1889                           | 3.359                            | Based on NMA (1)                                 |
| SIM12 + PR24-48 RGT               | 0.7241                              | 0.4215                           | 1.283                            | Based on NMA (1)                                 |
| B24 PR28-48 RGT                   | 1.038                               | 0.4271                           | 2.241                            | Based on NMA (1)                                 |
| PR24                              | 0.756                               | 0.1592                           | 2.831                            | Based on NMA (1)                                 |
| SIM12 + SOF12 + RBV12             | 0.4174                              | 0.08099                          | 1.534                            | Assume same as PAR/RIT12 + OMB12 + DAS12 + RBV12 |
| DCV12 + SOF12                     | 0.5062                              | 0.03573                          | 3.145                            | Based on NMA (1)                                 |
| <b>Anemia</b>                     |                                     |                                  |                                  |                                                  |
| Reference baseline PR48           | 0.2136 <sup>a</sup>                 | 0.1838                           | 0.2459                           | Based on NMA (1)                                 |
| SOF12 + RBV12                     | 0.6949                              | 0.3601                           | 1.309                            | Based on NMA (1)                                 |
| SOF24 + RBV24                     | 1.263                               | 0.4806                           | 2.528                            | Based on NMA (1)                                 |
| SIM12 + SOF12                     | 0.3454                              | 0.1431                           | 0.7469                           | Assume same as PAR/RIT12 + OMB12 + DAS12         |
| SOF12 + LDV12                     | 0.05568                             | 0.02193                          | 0.1322                           | Based on NMA (1)                                 |
| PAR/RIT12 + OMB12 + DAS12         | 0.3454                              | 0.1431                           | 0.7469                           | Based on NMA (1)                                 |
| PAR/RIT12 + OMB12 + DAS12 + RBV12 | 0.3826                              | 0.1549                           | 0.8366                           | Based on NMA (1)                                 |
| T12 PR24-48 RGT q8                | 1.872                               | 1.316                            | 2.496                            | Based on NMA (1)                                 |

Appendix to: Wong WWL, Lee KM, Singh S, et al. Drug therapies for chronic hepatitis C infection: a cost-effectiveness analysis. *CMAJ Open* 2017. DOI:10.9778/cmajo.20160161. Copyright © 2017 The Author(s) or their employer(s).  
To receive this resource in an accessible format, please contact us at [cmajgroup@cmaj.ca](mailto:cmajgroup@cmaj.ca).

| <b>Adverse Events</b>                |                                     |                                  |                                  |                                                        |
|--------------------------------------|-------------------------------------|----------------------------------|----------------------------------|--------------------------------------------------------|
| <b>Description</b>                   | <b>Baseline<sup>a</sup>/<br/>RR</b> | <b>Lower Limit<br/>(95% CrI)</b> | <b>Upper Limit<br/>(95% CrI)</b> | <b>Probability Distribution</b>                        |
| SOF12 PR12                           | 1.487                               | 0.8038                           | 2.449                            | Based on NMA (1)                                       |
| SOF12 PR24-48 RGT                    | 0.8758                              | 0.4101                           | 1.728                            | Based on NMA (1)                                       |
| SIM12 PR24-48 RGT                    | 0.8232                              | 0.5901                           | 1.118                            | Based on NMA (1)                                       |
| B24 PR28-48 RGT                      | 1.815                               | 1.266                            | 2.439                            | Based on NMA (1)                                       |
| PR24                                 | 0.9708                              | 0.4121                           | 2.065                            | Based on NMA (1)                                       |
| SIM12 + SOF12 + RBV12                | 0.3826                              | 0.1549                           | 0.8366                           | Assume same as<br>PAR/RIT12 + OMB12 +<br>DAS12 + RBV12 |
| DCV12 + SOF12                        | 0.08548                             | 0.005052                         | 0.6961                           | Based on NMA (1)                                       |
| <b>Rash</b>                          |                                     |                                  |                                  |                                                        |
| Reference baseline<br>PR48           | 0.1828 <sup>a</sup>                 | 0.1465                           | 0.2186                           | Based on NMA (1)                                       |
| SOF12 + RBV12                        | 0.5244                              | 0.167                            | 1.598                            | Based on NMA (1)                                       |
| SOF24 + RBV24                        | 0.7655                              | 0.07902                          | 2.721                            | Based on NMA (1)                                       |
| SIM12 + SOF12                        | 0.077192 <sup>a</sup>               | 0.005312                         | 0.502889                         | Assume same as<br>experienced patients                 |
| SOF12 + LDV12                        | 0.2626                              | 0.1415                           | 0.4803                           | Based on NMA (1)                                       |
| PAR/RIT12 + OMB12 +<br>DAS12         | 0.2194                              | 0.08837                          | 0.525                            | Based on NMA (1)                                       |
| PAR/RIT12 + OMB12 +<br>DAS12 + RBV12 | 0.7214                              | 0.3777                           | 1.301                            | Based on NMA (1)                                       |
| T12 PR24-48 RGT q8                   | 1.578                               | 1.038                            | 2.262                            | Based on NMA (1)                                       |
| SOF12 PR12                           | 0.8014                              | 0.3667                           | 1.771                            | Based on NMA (1)                                       |
| SOF12 PR24-48 RGT                    | 1.597                               | 0.7911                           | 2.955                            | Based on NMA (1)                                       |
| SIM12 PR24-48 RGT                    | 1.117                               | 0.8079                           | 1.519                            | Based on NMA (1)                                       |
| B24 PR28-48 RGT                      | 1.11                                | 0.6968                           | 1.682                            | Based on NMA (1)                                       |
| PR24                                 | 1.03                                | 0.3068                           | 2.839                            | Based on NMA (1)                                       |
| SIM12 + SOF12 + RBV12                | 0.237167 <sup>a</sup>               | 0.047817                         | 0.634031                         | Assume same as<br>experienced patients                 |
| DCV12 + SOF12                        | 0.372                               | 0.05255                          | 1.613                            | Based on NMA (1)                                       |
| <b>Treatment-Experienced</b>         |                                     |                                  |                                  |                                                        |
| <b>Depression</b>                    |                                     |                                  |                                  |                                                        |
| Reference baselinePR48               | 0.1318                              | 0.09864                          | 0.1697                           | Based on NMA (1)                                       |
| SOF12 + RBV12                        | 0.4582                              | 0.1368                           | 1.314                            | Based on NMA (1)                                       |
| SIM12 + SOF12                        | 0.2691                              | 0.06677                          | 0.9281                           | Assume same as<br>PAR/RIT12 + OMB12 +<br>DAS12         |
| SOF12 + LDV12                        | 0.002607 <sup>a</sup>               | 0.000305                         | 0.013735                         | Assume same as Naive<br>patients                       |
| SOF24 + LDV24                        | 0.002607 <sup>a</sup>               | 0.000305                         | 0.013735                         | Assume same as SOF12 +<br>LDV12                        |
| SOF12 + LDV12 + RBV12                | 0.6401                              | 0.2198                           | 1.648                            | Based on NMA (1)                                       |
| PAR/RIT12 + OMB12 +<br>DAS12         | 0.2691                              | 0.06677                          | 0.9281                           | Assume same as<br>PAR/RIT12 + OMB12 +<br>DAS12 + RBV12 |

| <b>Adverse Events</b>             |                                     |                                  |                                  |                                                  |
|-----------------------------------|-------------------------------------|----------------------------------|----------------------------------|--------------------------------------------------|
| <b>Description</b>                | <b>Baseline<sup>a</sup>/<br/>RR</b> | <b>Lower Limit<br/>(95% CrI)</b> | <b>Upper Limit<br/>(95% CrI)</b> | <b>Probability Distribution</b>                  |
| PAR/RIT12 + OMB12 + DAS12 + RBV12 | 0.2691                              | 0.06677                          | 0.9281                           | Based on NMA (1)                                 |
| T12 PR48 q8                       | 0.6684                              | 0.3521                           | 1.264                            | Based on NMA (1)                                 |
| SOF12 PR12                        | 0.078924 <sup>a</sup>               | 0.029457                         | 0.211431                         | Assume same as Naive patients                    |
| SIM12 PR24-48 RGT                 | 0.099998 <sup>a</sup>               | 0.058209                         | 0.177182                         | Assume same as Naive patients                    |
| SIM12 PR48                        | 0.912                               | 0.4586                           | 1.765                            | Based on NMA (1)                                 |
| SIM12 + SOF12 + RBV12             | 0.2691                              | 0.06677                          | 0.9281                           | Assume same as PAR/RIT12 + OMB12 + DAS12 + RBV12 |
| SOF16 + RBV16                     | 0.4582                              | 0.1368                           | 1.314                            | Assume same as SOF12 + RBV12                     |
| B32 PR36-48 RGT                   | 0.9477                              | 0.4244                           | 1.986                            | Based on NMA (1)                                 |
| <b>Anemia</b>                     |                                     |                                  |                                  |                                                  |
| Reference baseline PR48           |                                     |                                  |                                  | Based on NMA (1)                                 |
| SOF12 + RBV12                     | 0.1901                              | 0.1625                           | 0.2202                           | Based on NMA (1)                                 |
|                                   | 0.6957                              | 0.2952                           | 1.605                            | Based on NMA (1)                                 |
| SIM12 + SOF12                     | 0.009479                            | 7.65E-04                         | 0.07197                          | Assume same as PAR/RIT12 + OMB12 + DAS12         |
| SOF12 + LDV12                     | 0.02436                             | 0.00283                          | 0.1074                           | Based on NMA (1)                                 |
| SOF24 + LDV24                     | 0.02436                             | 0.00283                          | 0.1074                           | Assume same as SOF12 + LDV12                     |
| SOF12 + LDV12 + RBV12             | 0.3139                              | 0.1473                           | 0.5881                           | Based on NMA (1)                                 |
| PAR/RIT12 + OMB12 + DAS12         | 0.009479                            | 7.65E-04                         | 0.07197                          | Based on NMA (1)                                 |
| PAR/RIT12 + OMB12 + DAS12 + RBV12 | 0.2731                              | 0.1146                           | 0.6623                           | Based on NMA (1)                                 |
| T12 PR48 q8                       | 1.944                               | 1.313                            | 2.792                            | Based on NMA (1)                                 |
| SOF12 + PR12                      | 1.016                               | 0.5612                           | 1.692                            | Based on NMA (1)                                 |
| SIM12 + PR24-48 RGT               | 0.8345                              | 0.4458                           | 1.478                            | Based on NMA (1)                                 |
| SIM12 + PR48                      | 0.6838                              | 0.3979                           | 1.167                            | Based on NMA (1)                                 |
| SIM12 + SOF12 + RBV12             | 0.2731                              | 0.1146                           | 0.6623                           | Assume same as PAR/RIT12 + OMB12 + DAS12 + RBV12 |
| SOF16 + RBV16                     | 0.6957                              | 0.2952                           | 1.605                            | Assume same as SOF12 + RBV12                     |
| B32 PR36-48 RGT                   | 2.402                               | 1.547                            | 3.593                            | Based on NMA (1)                                 |
| <b>Rash</b>                       |                                     |                                  |                                  |                                                  |
| Reference baseline PR48           |                                     |                                  |                                  | Based on NMA (1)                                 |
| SOF12 + RBV12                     | 0.1322                              | 0.1071                           | 0.1594                           | Based on NMA (1)                                 |
| SIM12 + SOF12                     | 1.112                               | 0.3782                           | 2.734                            | Based on NMA (1)                                 |
| SOF12 + LDV12                     | 0.5839                              | 0.04018                          | 3.804                            | Based on NMA (1)                                 |
|                                   | 0.1656                              | 0.04229                          | 0.5608                           | Based on NMA (1)                                 |

| <b>Adverse Events</b>             |                                     |                                  |                                  |                                 |
|-----------------------------------|-------------------------------------|----------------------------------|----------------------------------|---------------------------------|
| <b>Description</b>                | <b>Baseline<sup>a</sup>/<br/>RR</b> | <b>Lower Limit<br/>(95% CrI)</b> | <b>Upper Limit<br/>(95% CrI)</b> | <b>Probability Distribution</b> |
| SOF24 + LDV24                     | 0.1656                              | 0.04229                          | 0.5608                           | Assume same as SOF12 + LDV12    |
| SOF12 + LDV12 + RBV12             | 0.6445                              | 0.3272                           | 1.316                            | Based on NMA (1)                |
| PAR/RIT12 + OMB12 + DAS12         | 0.05563                             | 0.003309                         | 0.3552                           | Based on NMA (1)                |
| PAR/RIT12 + OMB12 + DAS12 + RBV12 | 0.6094                              | 0.2367                           | 1.812                            | Based on NMA (1)                |
| T12 PR48 q8                       | 2.216                               | 1.401                            | 3.796                            | Based on NMA (1)                |
| SOF12 + PR12                      | 1.39                                | 0.6411                           | 2.806                            | Based on NMA (1)                |
| SIM12 + PR24-48 RGT               | 1.019                               | 0.444                            | 2.121                            | Based on NMA (1)                |
| SIM12 + PR48                      | 1.44                                | 0.8209                           | 2.581                            | Based on NMA (1)                |
| SIM12 + SOF12 + RBV12             | 1.794                               | 0.3617                           | 4.796                            | Based on NMA (1)                |
| SOF16 + RBV16                     | 1.112                               | 0.3782                           | 2.734                            | Assume same as SOF12 + RBV12    |
| B32 PR36-48 RGT                   | 2.194                               | 1.066                            | 3.943                            | Based on NMA (1)                |

| <b>Discontinuation Rate</b>       |                      |                                 |                                 |                                                         |
|-----------------------------------|----------------------|---------------------------------|---------------------------------|---------------------------------------------------------|
| <b>Description</b>                | <b>Base Estimate</b> | <b>Lower Limit<br/>(95% CI)</b> | <b>Upper Limit<br/>(95% CI)</b> | <b>Probability Distribution/ Note</b>                   |
| <b>Treatment-Naive</b>            |                      |                                 |                                 |                                                         |
| PR48                              | 0.173                | 0.096                           | 0.292                           | Beta(6.818,32.594)                                      |
| SOF12 + RBV12                     | 0.089                | 0.038                           | 0.194                           | Beta(2.529,25.887)                                      |
| SOF24 + RBV24                     | 0.054                | 0.015                           | 0.180                           | Beta(0.641,11.23)                                       |
| SIM12 + SOF12                     | 0.033                | 0.002                           | 0.366                           | Beta(0.005,0.146) / Assume same as experienced patients |
| SOF12 + LDV12                     | 0.044                | 0.023                           | 0.083                           | Beta(4.823,104.799)                                     |
| PAR/RIT12 + OMB12 + DAS12         | 0.005                | 0.001                           | 0.033                           | Beta(0.122,24.261)                                      |
| PAR/RIT12 + OMB12 + DAS12 + RBV12 | 0.015                | 0.003                           | 0.071                           | Beta(0.268,17.578)                                      |
| T12 PR24-48 RGT q8                | 0.092                | 0.074                           | 0.114                           | Beta(63.423,625.957)                                    |
| SOF12 + PR12                      | 0.108                | 0.082                           | 0.142                           | Beta(35.893,296.45)                                     |
| SOF12 + PR24-48 RGT               | 0.106                | 0.045                           | 0.231                           | Beta(2.466,20.794)                                      |
| SIM12 + PR24-48 RGT               | 0.070                | 0.052                           | 0.093                           | Beta(34.387,456.862)                                    |
| B24 PR28-48 RGT                   | 0.212                | 0.173                           | 0.257                           | Beta(69.745,259.242)                                    |
| PR24                              | 0.165                | 0.096                           | 0.269                           | Beta(8.242,41.71)                                       |
| SIM12 + SOF12 + RBV12             | 0.018                | 0.001                           | 0.230                           | Beta(0.01,0.563) / Assume same as experienced patients  |
| DCV12 + SOF12                     | 0.044                | 0.023                           | 0.083                           | Assume same as SOF12 + LDV12                            |

| <b>Discontinuation Rate</b>       |                      |                             |                             |                                                     |
|-----------------------------------|----------------------|-----------------------------|-----------------------------|-----------------------------------------------------|
| <b>Description</b>                | <b>Base Estimate</b> | <b>Lower Limit (95% CI)</b> | <b>Upper Limit (95% CI)</b> | <b>Probability Distribution/ Note</b>               |
| <b>Treatment-Experienced</b>      |                      |                             |                             |                                                     |
| PR48                              | 0.114                | 0.077                       | 0.166                       | Beta(16.919,131.495)                                |
| SOF12 + RBV12                     | 0.081                | 0.004                       | 0.684                       | Beta(0.002,0.023)                                   |
| SIM12 + SOF12                     | 0.033                | 0.002                       | 0.366                       | Beta(0.005,0.146)                                   |
| SOF12 + LDV12                     | 0.017                | 0.003                       | 0.079                       | Beta(0.279,16.111)                                  |
| SOF24 + LDV24                     | 0.006                | 0                           | 0.094                       | Beta(0.012,2.068)                                   |
| SOF12 + LDV12 + RBV12             | 0.016                | 0.005                       | 0.049                       | Beta(0.909,55.92)                                   |
| PAR/RIT12 + OMB12 + DAS12         | 0.005                | 0.000                       | 0.078                       | Beta(0.014,2.721)                                   |
| PAR/RIT12 + OMB12 + DAS12 + RBV12 | 0.015                | 0.003                       | 0.071                       | Beta(0.268,17.578) / Assumed same as naive patients |
| T12 PR48 q8                       | 0.077                | 0.059                       | 0.100                       | Beta(41.303,495.096)                                |
| SOF12 + PR12                      | 0.006                | 0.000                       | 0.091                       | Beta(0.014,2.288)                                   |
| SIM12 + PR24-48 RGT               | 0.038                | 0.021                       | 0.070                       | Beta(5.388,136.409)                                 |
| SIM12 + PR48                      | 0.059                | 0.040                       | 0.085                       | Beta(19.323,308.191)                                |
| SIM12 + SOF12 + RBV12             | 0.018                | 0.001                       | 0.230                       | Beta(0.01,0.563)                                    |
| SOF16 + RBV16                     | 0.081                | 0.004                       | 0.684                       | Assume same as SOF12 + RBV12                        |
| B32 PR36-48 RGT                   | 0.099                | 0.061                       | 0.155                       | Beta(11.165,101.61)                                 |
| DCV12 + SOF12                     | 0.017                | 0.003                       | 0.079                       | Assume same as SOF12 + LDV12                        |

| <b>Chronic Hepatitis C–Related Mortality</b> |                      |                           |                           |                                 |
|----------------------------------------------|----------------------|---------------------------|---------------------------|---------------------------------|
| <b>Description</b>                           | <b>Base Estimate</b> | <b>Lower Limit (-25%)</b> | <b>Upper Limit (+25%)</b> | <b>Probability Distribution</b> |
| HCC(2)                                       | 0.411                | 0.31                      | 0.51                      | Beta (38.6, 55.3)               |
| Decompensated cirrhosis(3)                   | 0.216                | 0.162                     | 0.27                      | Beta (49.96, 181.3)             |
| Liver transplant (first year)(4)             | 0.142                | 0.124                     | 0.159                     | Beta (213.4,1289.7)             |
| Liver transplant (> 1 year)(4)               | 0.034                | 0.024                     | 0.043                     | Beta (44.6,1268.1)              |

## Chronic Hepatitis C–Related Cost

| Description                                                    | Base Estimate | Lower Limit (-25%) | Upper Limit (+25%) | Probability Distribution |
|----------------------------------------------------------------|---------------|--------------------|--------------------|--------------------------|
| <b>Annual Cost CHC infection Early Phase(5)</b>                |               |                    |                    |                          |
| Age 45 to 54 (base case)                                       | \$4,589       | \$4,498            | \$4,682            | Gamma(9739.355,2.122)    |
| Age 35 to 44 (SA)                                              | \$3,888       | \$3,812            | \$3,967            | Gamma(9688.54,2.492)     |
| Age 55 to 64 (SA)                                              | \$5,541       | \$5,377            | \$5,710            | Gamma(4299.945,0.776)    |
| <b>Annual Cost CHC infection Late Phase(5)</b>                 |               |                    |                    |                          |
| Age 45 to 54 (base case)                                       | \$14,597      | \$13,475           | \$15,812           | Gamma(577.344,0.04)      |
| Age 35 to 44 (SA)                                              | \$12,054      | \$11,582           | \$12,546           | Gamma(2401,0.199)        |
| Age 55 to 64 (SA)                                              | \$12,337      | \$11,619           | \$13,100           | Gamma(1045.755,0.085)    |
| <b>Annual Cost CHC infection Pre-death Phase(5)</b>            |               |                    |                    |                          |
| Age 45 to 54 (base case)                                       | \$41,823      | \$39,388           | \$44,410           | Gamma(1045.436,0.025)    |
| Age 35 to 44 (SA)                                              | \$35,544      | \$32,811           | \$38,504           | Gamma(576.779,0.016)     |
| Age 55 to 64 (SA)                                              | \$52,102      | \$49,561           | \$54,773           | Gamma(1522.022,0.029)    |
| <b>Annual Cost Non-CHC infection Before Pre-death Phase(5)</b> |               |                    |                    |                          |
| Age 45 to 54 (base case)                                       | \$2,362       | \$2,338            | \$2,387            | Gamma(35705.882,15.117)  |
| Age 35 to 44 (SA)                                              | \$1,813       | \$1,777            | \$1,850            | Gamma(9604,5.297)        |
| Age 55 to 64 (SA)                                              | \$3,925       | \$3,809            | \$4,044            | Gamma(4351.564,1.109)    |
| <b>Annual Cost Non-CHC infection Pre-death Phase(5)</b>        |               |                    |                    |                          |
| Age 45 to 54 (base case)                                       | \$45,207      | \$44,312           | \$46,120           | Gamma(9806.856,0.217)    |
| Age 35 to 44 (SA)                                              | \$42,291      | \$40,229           | \$44,459           | Gamma(1522.08,0.036)     |
| Age 55 to 64 (SA)                                              | \$44,542      | \$43,660           | \$45,442           | Gamma(9797.48,0.22)      |
| <b>Transplant-related Costs</b>                                |               |                    |                    |                          |
| Cost of transplant(6)                                          | \$120,593     | \$90,445           | \$150,741          | Gamma (64,0.0033)        |
| Annual cost of post-transplant follow-up care(6)               | \$19,400      | \$14,550           | \$24,250           | Gamma (64,0.0005)        |

## Cost of adverse events

| Description      | Base Estimate | Lower Limit (-25%) | Upper Limit (+25%) | Probability Distribution |
|------------------|---------------|--------------------|--------------------|--------------------------|
| Anemia(7, 8)     | \$2,060.41    | \$1,545.31         | \$2,575.51         | Gamma (64,0.0311)        |
| Depression(7, 8) | \$981.11      | \$735.83           | \$1,226.39         | Gamma (64,0.0652)        |
| Rash(7, 8)       | \$255.90      | \$191.92           | \$319.87           | Gamma (64.0,0.2501)      |

## Reference

1. CADTH Therapeutic Review: Drugs for Chronic Hepatitis C Infection: Clinical Report. Ottawa, Ontario, Canada: 2015.
2. Altekruse SF, McGlynn KA, Reichman ME. Hepatocellular carcinoma incidence, mortality, and survival trends in the United States from 1975 to 2005. *J Clin Oncol.* 2009;27(9):1485-91.
3. D'Amico G, Garcia-Tsao G, Pagliaro L. Natural history and prognostic indicators of survival in cirrhosis: a systematic review of 118 studies. *J Hepatol.* 2006;44(1):217-31.
4. Charlton M, Seaberg E, Wiesner R, Everhart J, Zetterman R, Lake J, et al. Predictors of patient and graft survival following liver transplantation for hepatitis C. *Hepatology.* 1998;28(3):823-30.
5. Krajden M, Kuo M, Zagorski B, Alvarez M, Yu A, Krahn M. Health care costs associated with hepatitis C: a longitudinal cohort study. *Can J Gastroenterol.* 2010;24(12):717-26.
6. Taylor MC, Greig PD, Detsky AS, McLeod RS, Abdoh A, Krahn MD. Factors associated with the high cost of liver transplantation in adults. *Canadian journal of surgery Journal canadien de chirurgie.* 2002;45(6):425-34.
7. Gao X, Stephens JM, Carter JA, Haider S, Rustgi VK. Impact of adverse events on costs and quality of life in protease inhibitor-based combination therapy for hepatitis C. *Expert Rev Pharmacoecon Outcomes Res.* 2012;12(3):335-43.
8. CADTH Therapeutic Review: Drugs for Chronic Hepatitis C Infection: Pharmacoeconomic Report. Ottawa, Ontario, Canada 2015.
